# Supplementary material for: NQO1 Deficiency Aggravates Renal Injury by Dysregulating Vps34/ATG14L Complex during Autophagy Initiation in Diabetic Nephropathy
Source: PubMed Central journal article supplement (PMC7926338; doi:10.3390/antiox10020333), 2021-02-23
Supplement: antioxidants-10-00333-s001.pdf [file antioxidants-10-00333-s001.pdf]

# Suppliment 1

|    | Antibody                              | Dilution ratio | Company                   | State    | Country | catalog number |
|----|---------------------------------------|----------------|---------------------------|----------|---------|----------------|
| 1  | anti-LC3                              | 1:1000         | Abcam                     | Cambrige | UK      | ab7543         |
| 2  | anti-p62                              | 1:1000         | Cell Signaling Technology | MA       | USA     | #5114S         |
| 3  | anti-mTOR                             | 1:1000         | Gene Tex                  | TX       | USA     | GTX101557      |
| 4  | anti-AMPK                             | 1:1000         | Cell Signaling Technology | MA       | USA     | #2532S         |
| 5  | anti-ATG7                             | 1:1000         | Santa Cruz                | TX       | USA     | SC33211        |
| 6  | anti-ATG14L                           | 1:1000         | Abcam                     | Cambrige | UK      | ab139727       |
| 7  | anti-NQO1                             | 1:1000         | Santa Cruz                | TX       | USA     | SC16464        |
| 8  | anti-KIM1                             | 1:1000         | Gene Tex                  | TX       | USA     | GTX12016       |
| 9  | anti-TGF- $\beta$ 1                   | 1:1000         | Abcam                     | Cambrige | UK      | ab64175        |
| 10 | anti-Smad3                            | 1:1000         | Santa Cruz                | TX       | USA     | SC101154       |
| 11 | anti- $\alpha$ -SMA                   | 1:1000         | Abcam                     | Cambrige | UK      | ab5694         |
| 12 | anti-matrix metallopeptidase 9 (MMP9) | 1:1000         | Abcam                     | Cambrige | UK      | ab38898        |
| 13 | anti- $\beta$ -actin                  | 1:5000         | Abcam                     | Cambrige | UK      | ab8229         |
| 14 | anti-Vps34                            | 1:1000         | Abcam                     | Cambrige | UK      | ab124905       |

# Suppliment 2

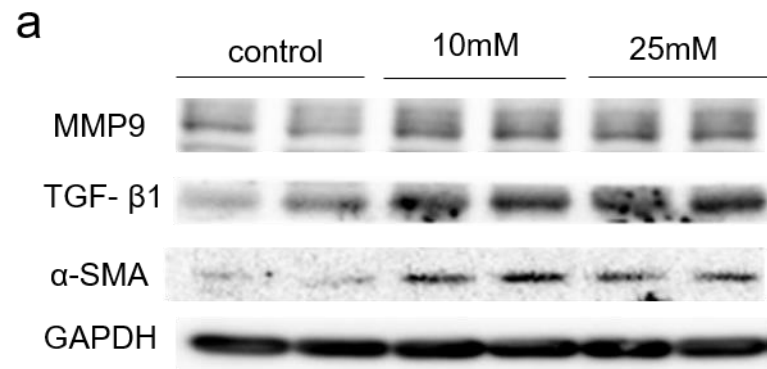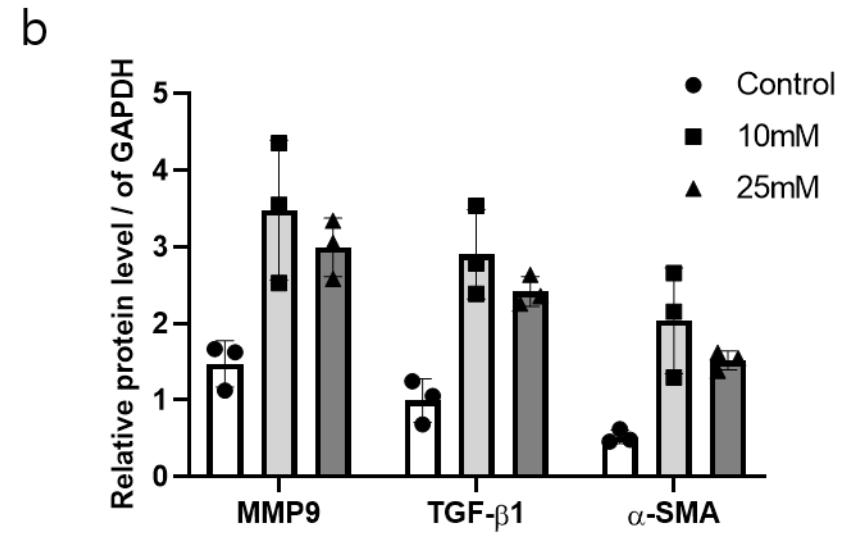

**Suppliment 2.** TGF- $\beta$ 1, the primary factor driving fibrosis, and matrix metallopeptidase 9 (MMP9), catalyzing the release of active TGF- $\beta$ 1, were expressed two times more in HG-treated cells than in the control. Finally, the expression of  $\alpha$ -SMA contributing to the slow contractile properties of myofibroblasts, was increased upon treatment with a 10 and 25 mM glucose concentration

# Suppliment 3

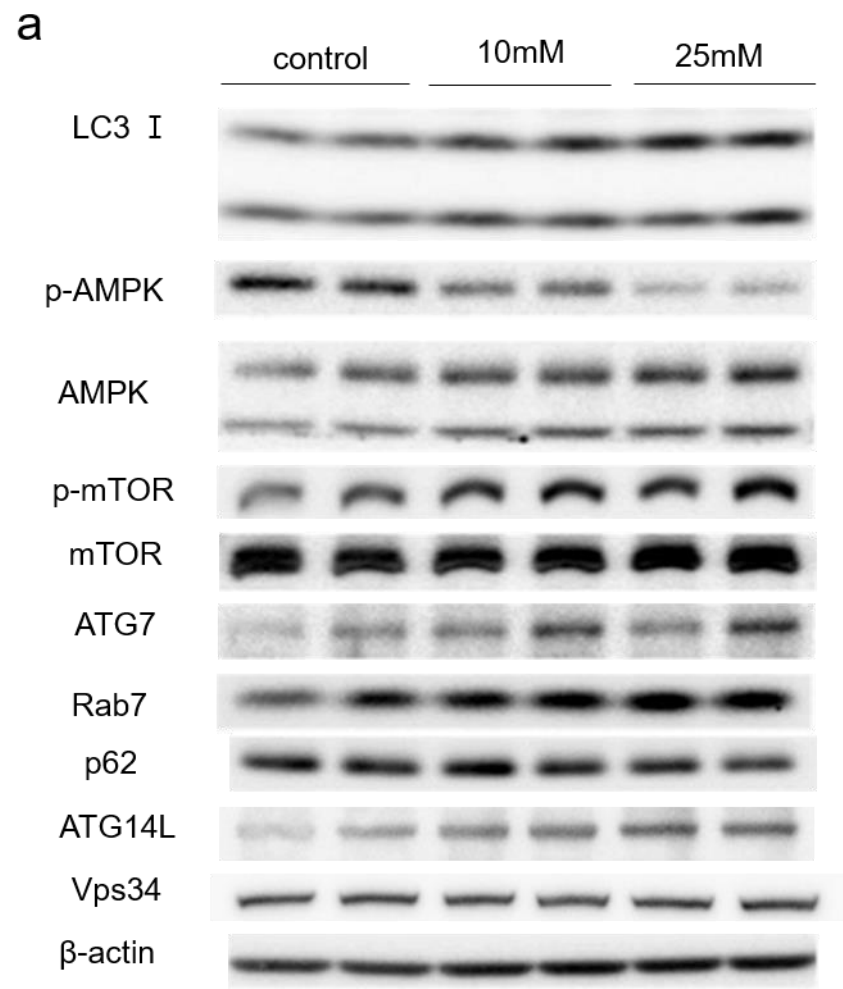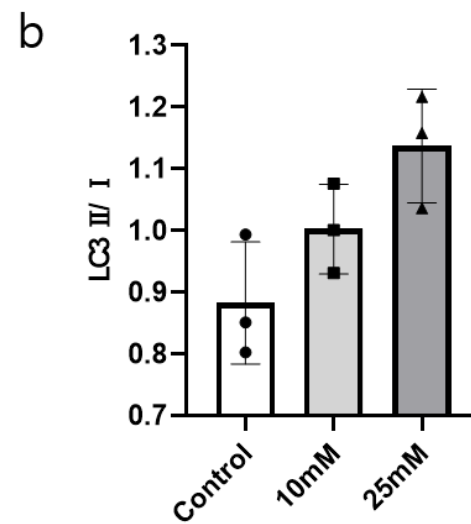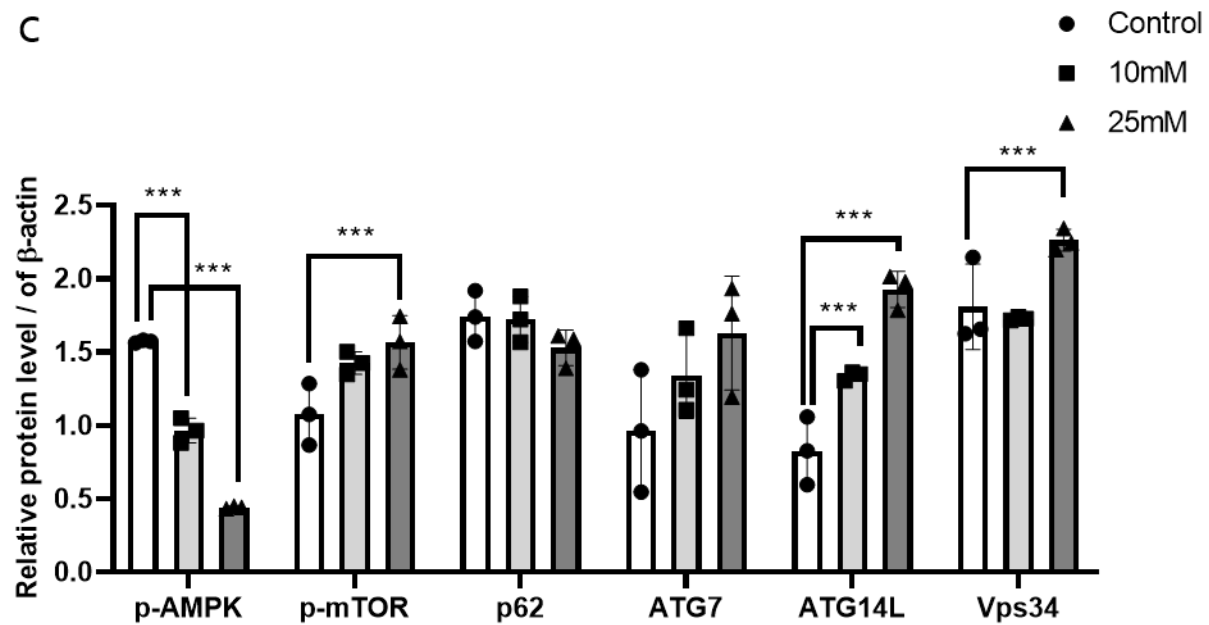

**Suppliment 3.** The expression of LC3-II was gradually increased while that of p62 was reduced in glucose treated cell. Moreover, the relative protein level of p-AMPK, a promoter of autophagy, was progressively significantly reduced ( $P < 0.001$ ), while that of p-mTOR, an inhibitor of autophagy, gradually increased with higher glucose concentration.

Furthermore, the expression of ATG14L and Vps34, which are needed to form the class III PI3 K complex, was significantly upregulated by HG ( $P < 0.001$ )
